# Supplementary material for: Whole Transcriptome Sequencing Unveils the Genomic Determinants of Putative Somaclonal Variation in Mint (Mentha L.)
Source: MDPI journal article supplement (doi:10.3390/ijms23105291), 2022-05-10

A

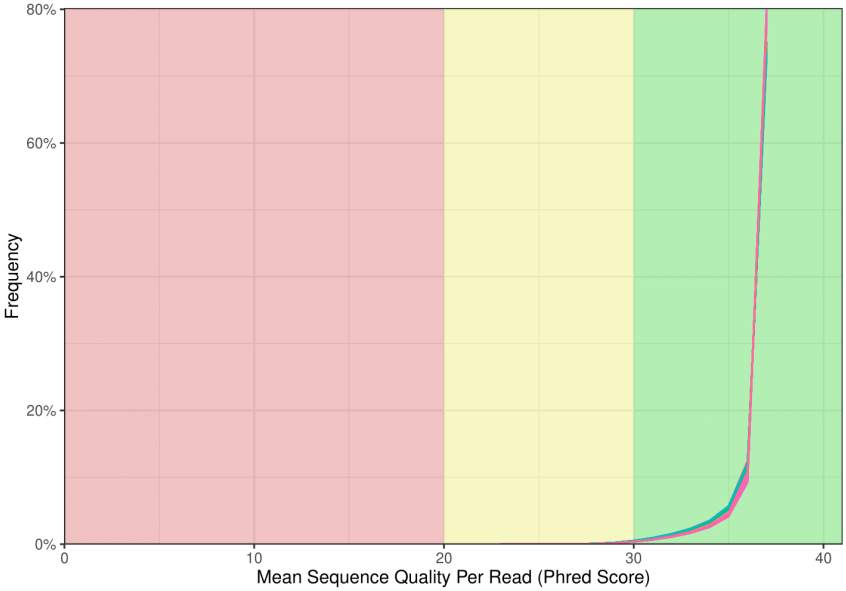

- Filename
- Trimmomatic on MLV20-15244\_1
  - Trimmomatic on MLV20-15245\_1
  - Trimmomatic on MLV20-15246\_1
  - Trimmomatic on MLV20-15247\_1
  - Trimmomatic on MLV20-15248\_1
  - Trimmomatic on MLV20-15249\_1
  - Trimmomatic on MLV20-15250\_1
  - Trimmomatic on MLV20-15251\_1
  - Trimmomatic on MLV20-15252\_1
  - Trimmomatic on MLV20-15253\_1
  - Trimmomatic on MLV20-15254\_1
  - Trimmomatic on MLV20-15255\_1
  - Trimmomatic on MLV20-15256\_1
  - Trimmomatic on MLV20-15257\_1
  - Trimmomatic on MLV20-15258\_1
  - Trimmomatic on MLV20-15259\_1
  - Trimmomatic on MLV20-15260\_1
  - Trimmomatic on MLV20-15261\_1
  - Trimmomatic on MLV20-15262\_1
  - Trimmomatic on MLV20-15263\_1
  - Trimmomatic on MLV20-15264\_1
  - Trimmomatic on MLV20-15265\_1
  - Trimmomatic on MLV20-15266\_1
  - Trimmomatic on MLV20-15267\_1
  - Trimmomatic on MLV20-15268\_1
  - Trimmomatic on MLV20-15269\_1
  - Trimmomatic on MLV20-15270\_1
  - Trimmomatic on MLV20-15271\_1
  - Trimmomatic on MLV20-15272\_1

B

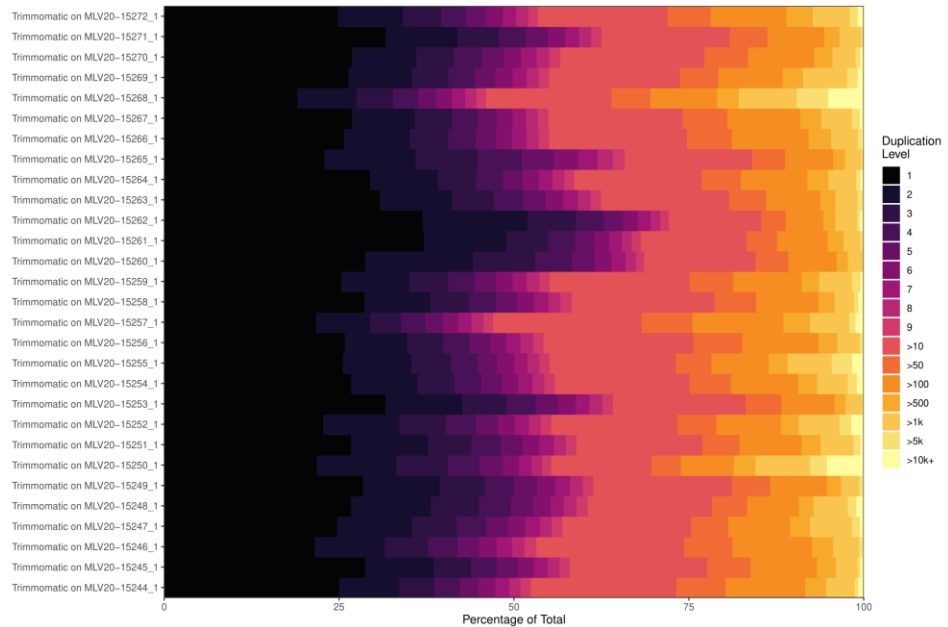

C

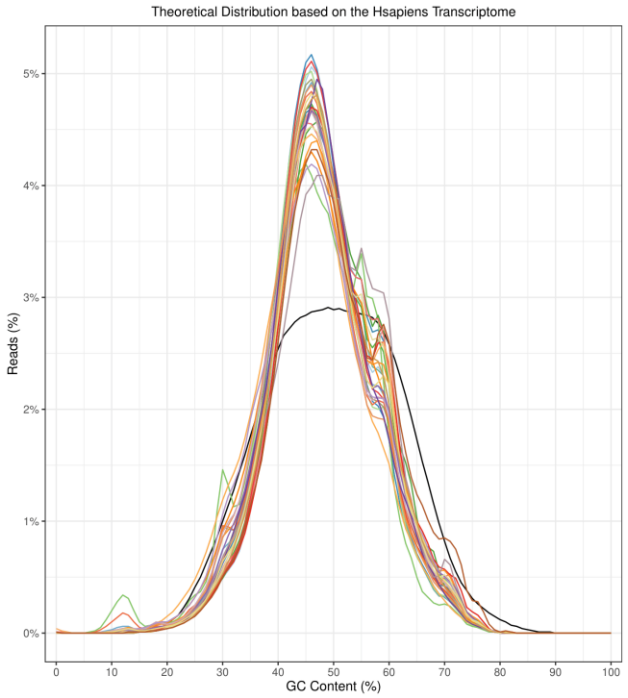

- Theoretical Distribution
- Trimmomatic on MLV20-15244\_1
  - Trimmomatic on MLV20-15245\_1
  - Trimmomatic on MLV20-15246\_1
  - Trimmomatic on MLV20-15247\_1
  - Trimmomatic on MLV20-15248\_1
  - Trimmomatic on MLV20-15249\_1
  - Trimmomatic on MLV20-15250\_1
  - Trimmomatic on MLV20-15251\_1
  - Trimmomatic on MLV20-15252\_1
  - Trimmomatic on MLV20-15253\_1
  - Trimmomatic on MLV20-15254\_1
  - Trimmomatic on MLV20-15255\_1
  - Trimmomatic on MLV20-15256\_1
  - Trimmomatic on MLV20-15257\_1
  - Trimmomatic on MLV20-15258\_1
  - Trimmomatic on MLV20-15259\_1
  - Trimmomatic on MLV20-15260\_1
  - Trimmomatic on MLV20-15261\_1
  - Trimmomatic on MLV20-15262\_1
  - Trimmomatic on MLV20-15263\_1
  - Trimmomatic on MLV20-15264\_1
  - Trimmomatic on MLV20-15265\_1
  - Trimmomatic on MLV20-15266\_1
  - Trimmomatic on MLV20-15267\_1
  - Trimmomatic on MLV20-15268\_1
  - Trimmomatic on MLV20-15269\_1
  - Trimmomatic on MLV20-15270\_1
  - Trimmomatic on MLV20-15271\_1
  - Trimmomatic on MLV20-15272\_1

D

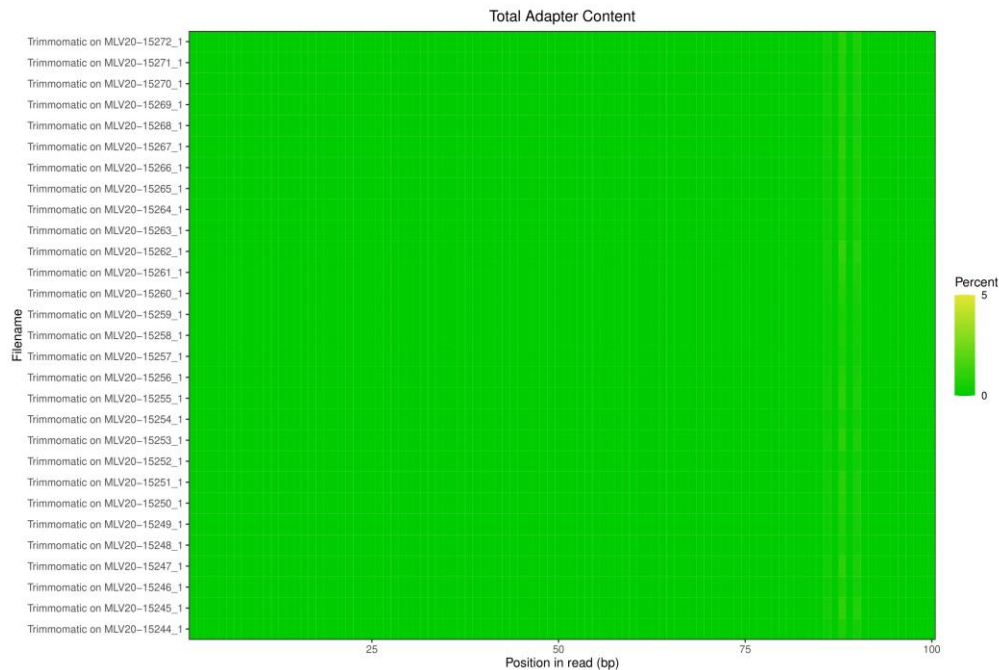

Supplement: s1 [file s1]
