# Supplementary figures and images for: Whole Transcriptome Sequencing Unveils the Genomic Determinants of Putative Somaclonal Variation in Mint (Mentha L.)
Source: MDPI journal article supplement (doi:10.3390/ijms23105291), 2022-05-10

# CYSTEINE AND METHIONINE METABOLISM

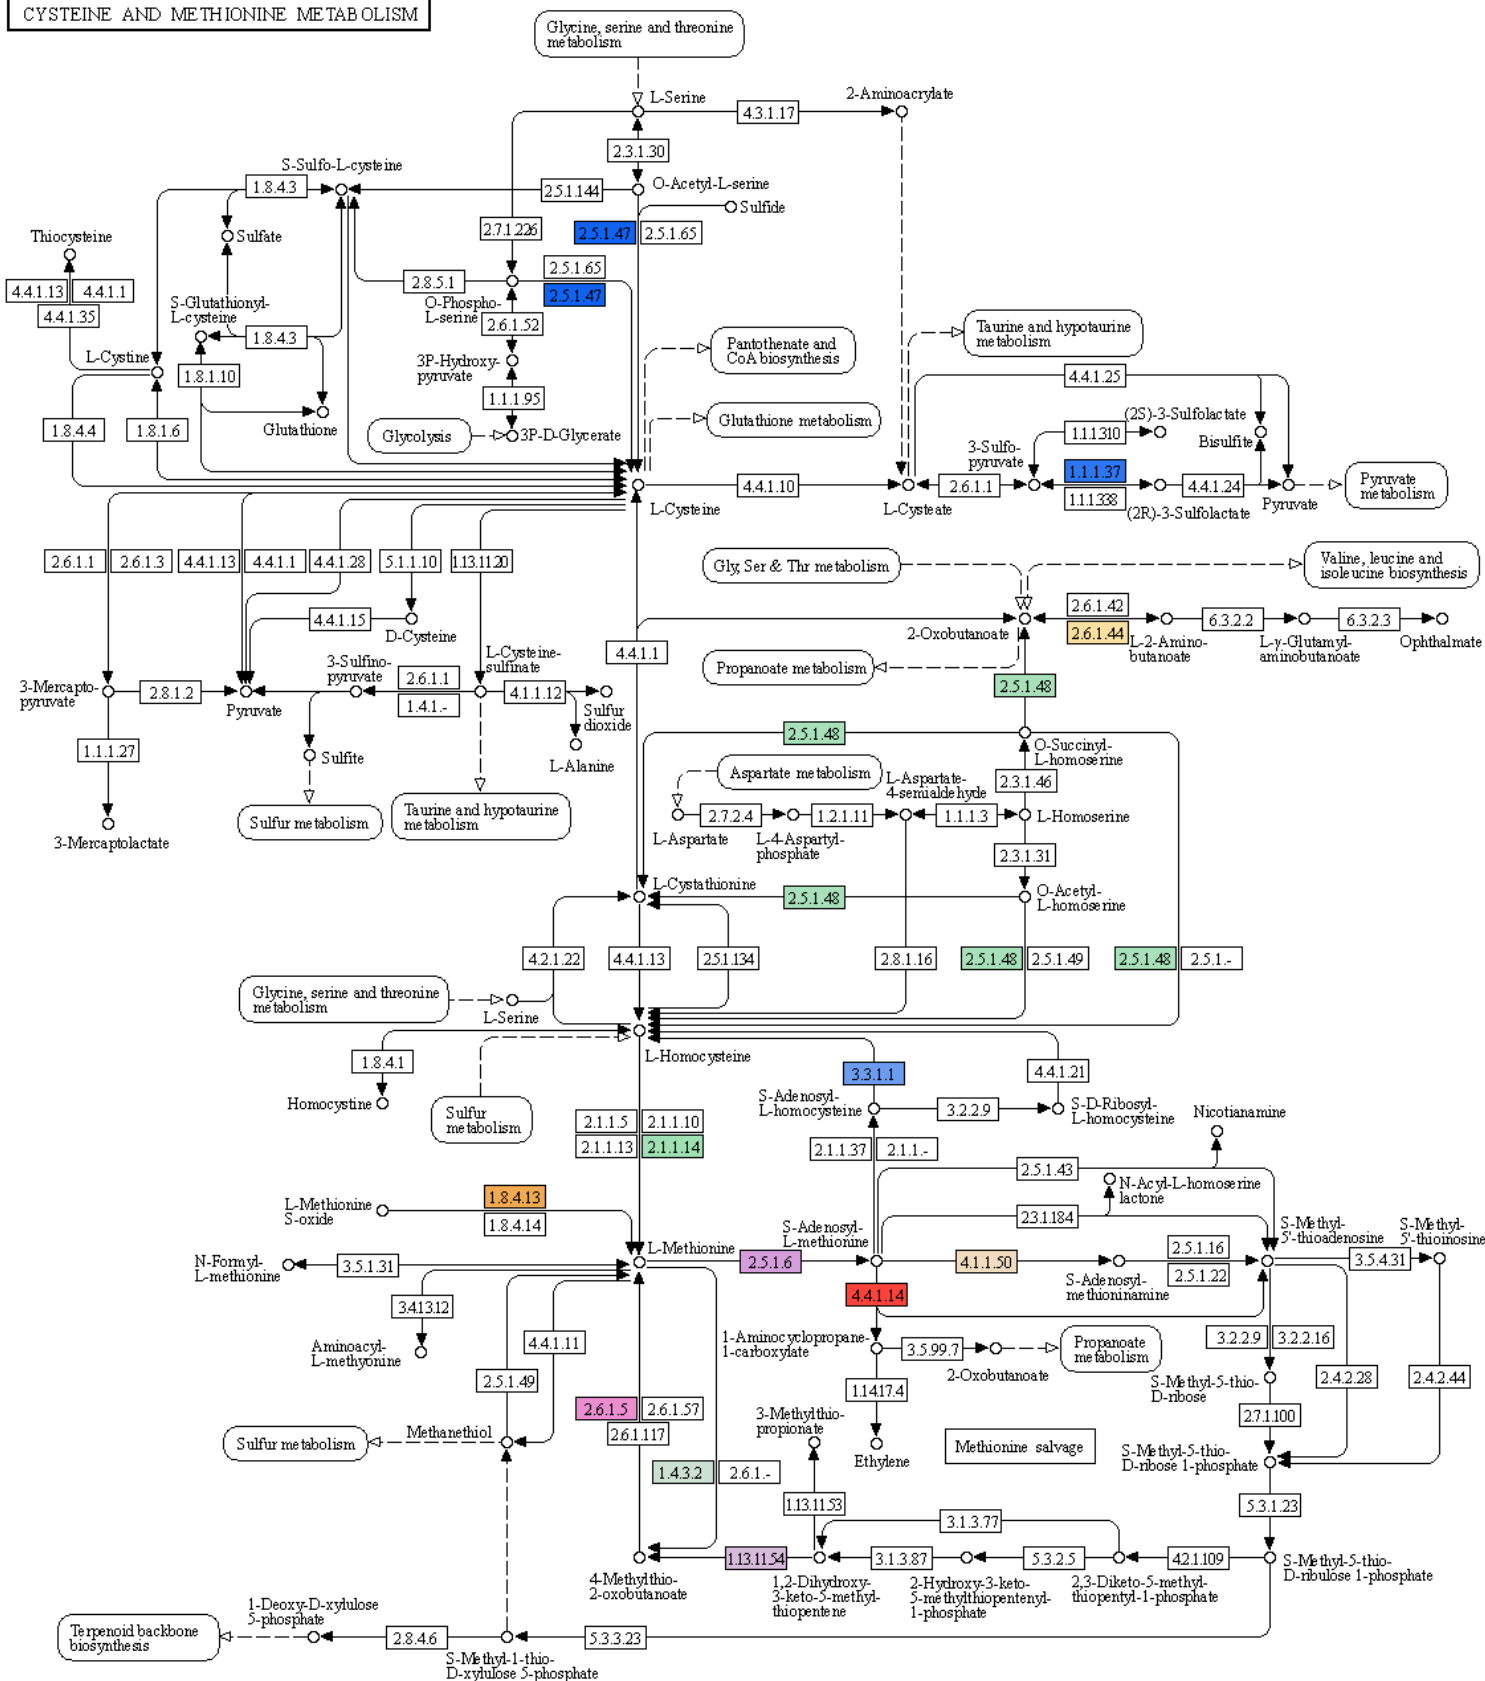

Supplement: s1 [file s1]

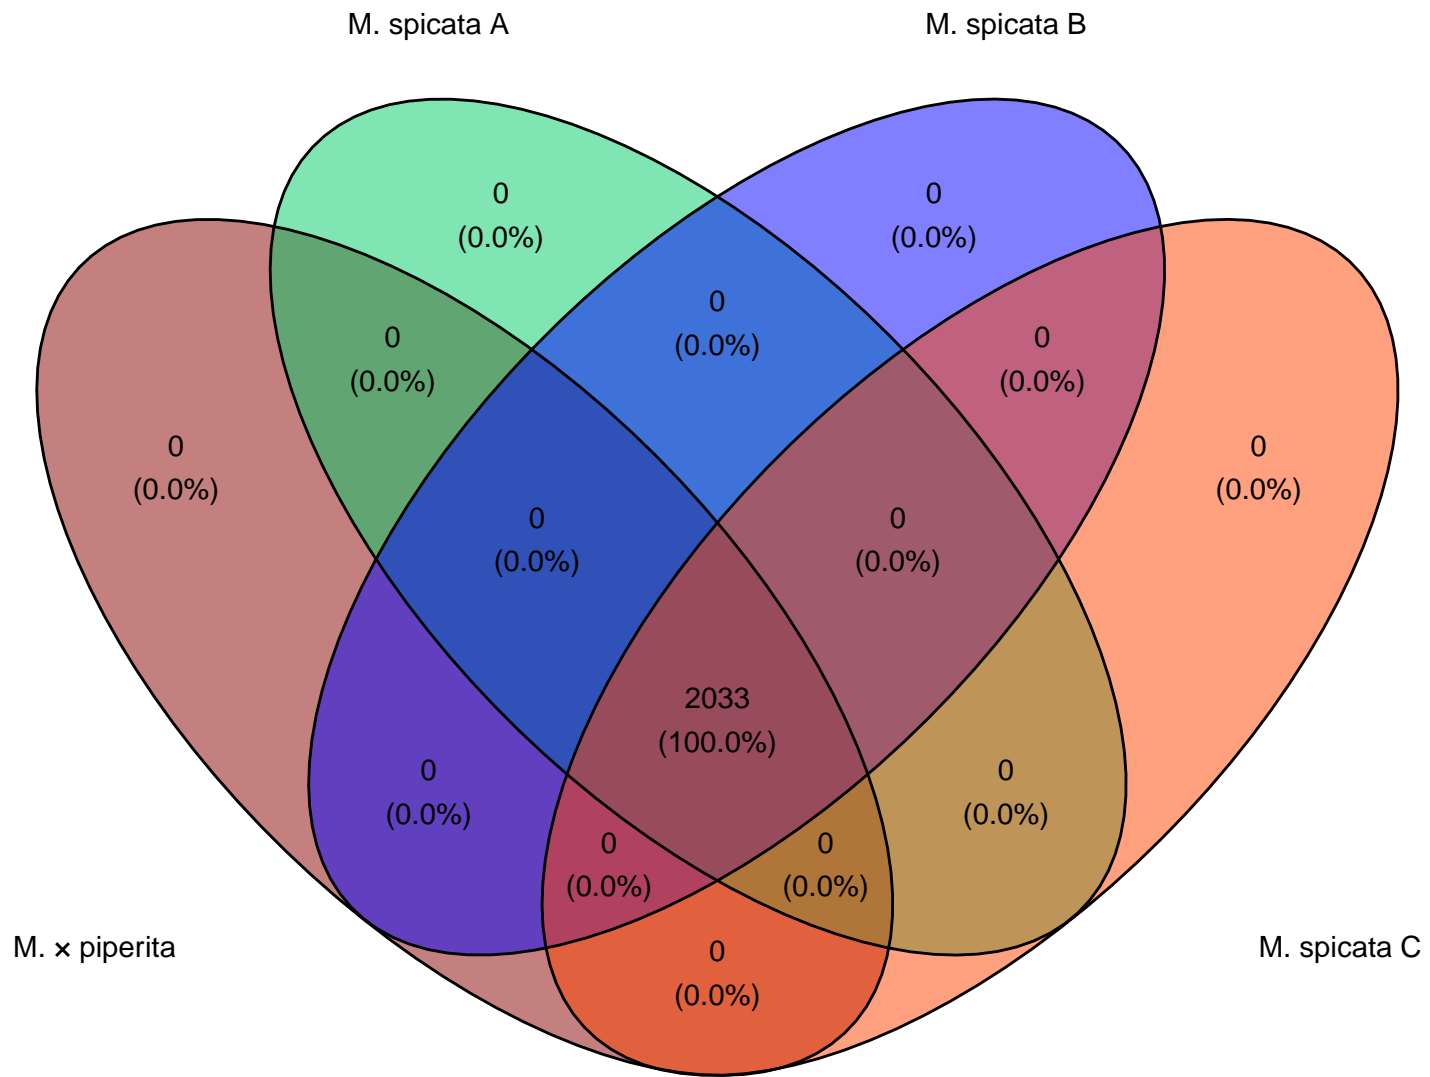

Supplement: s1 [file s1]

# GLYCOLYSIS / GLUCONEOGENESIS

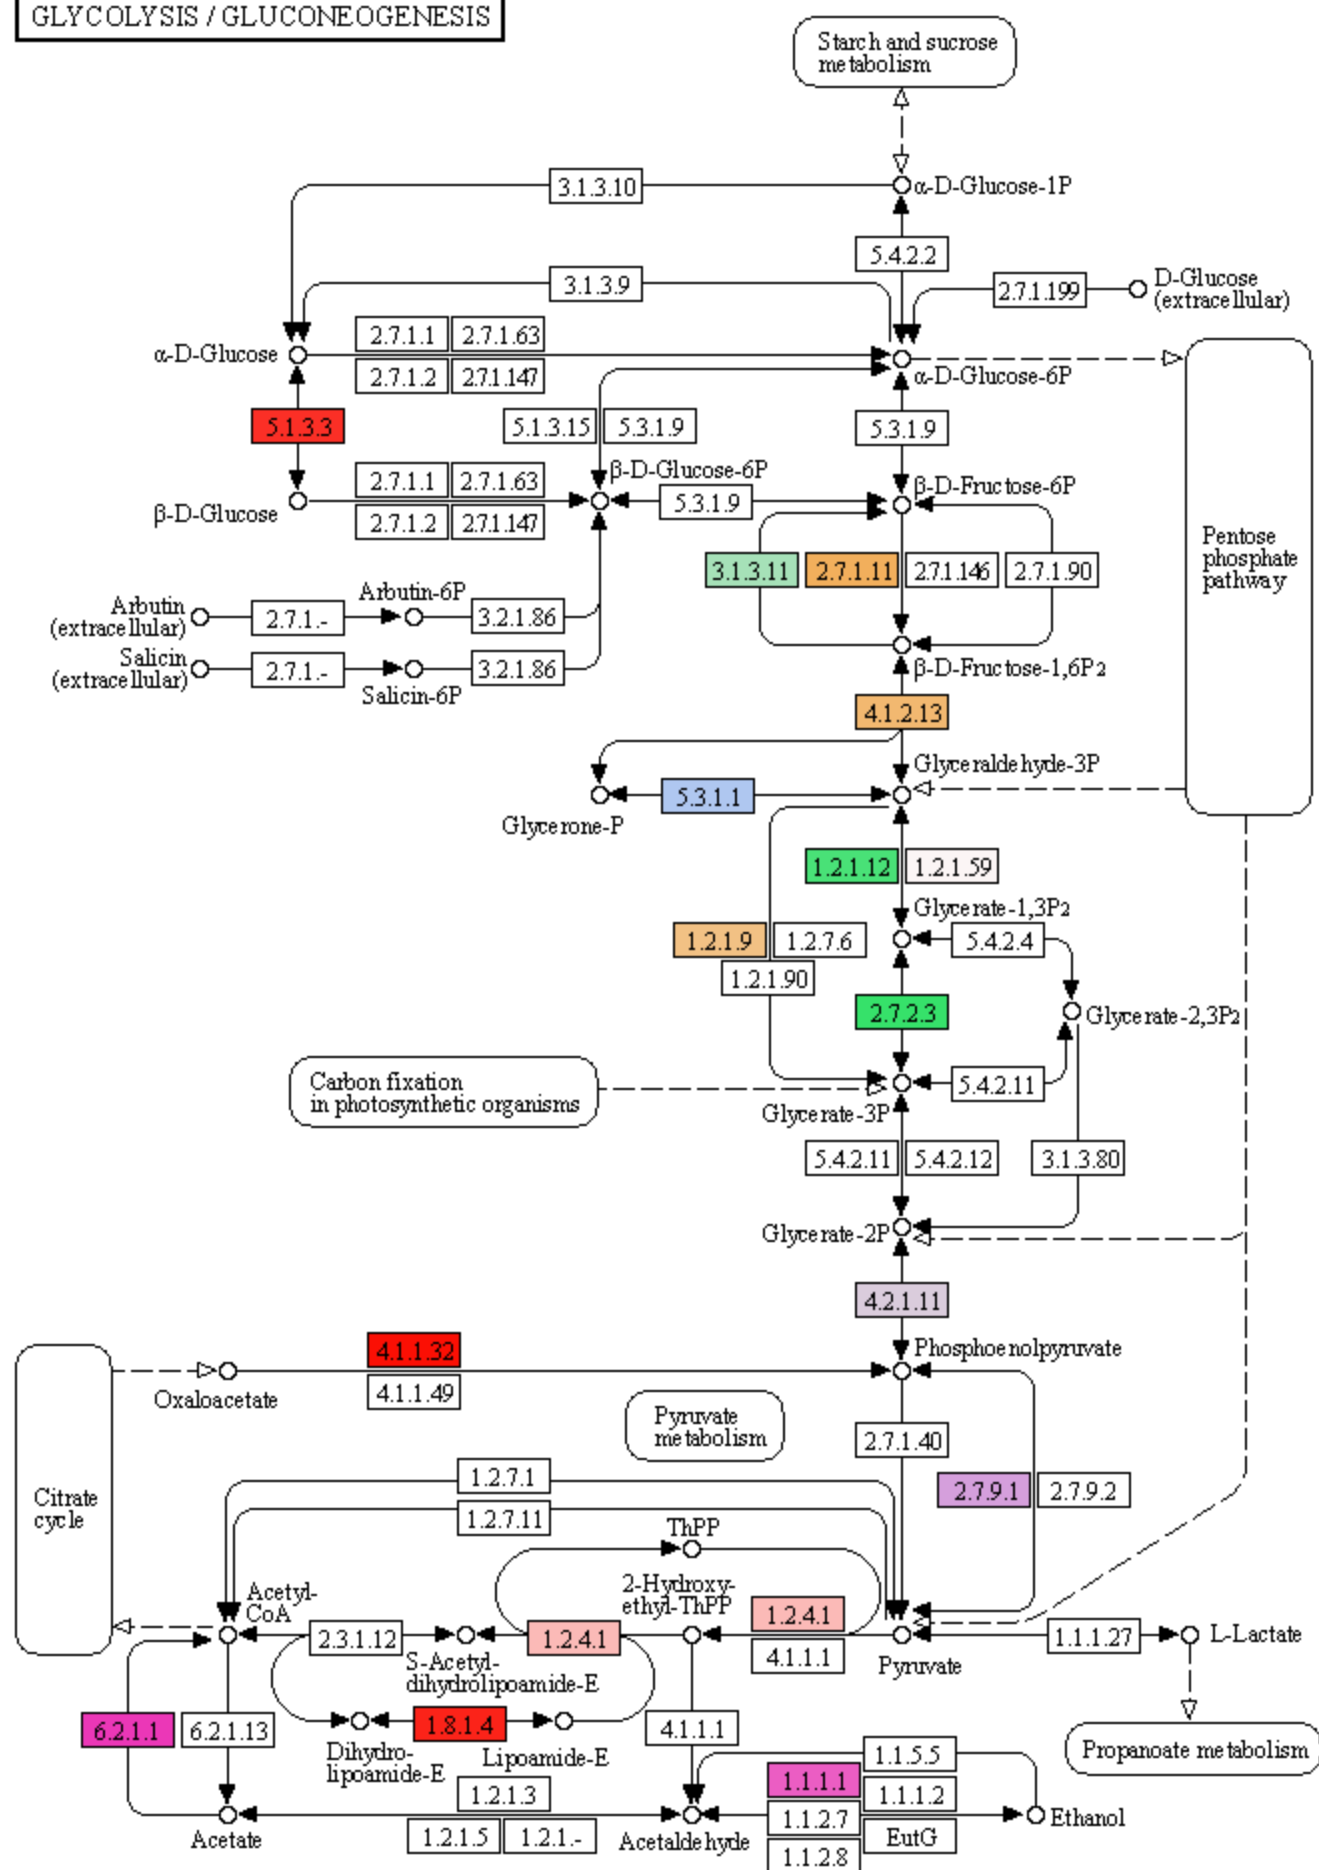

Supplement: s1 [file s1]

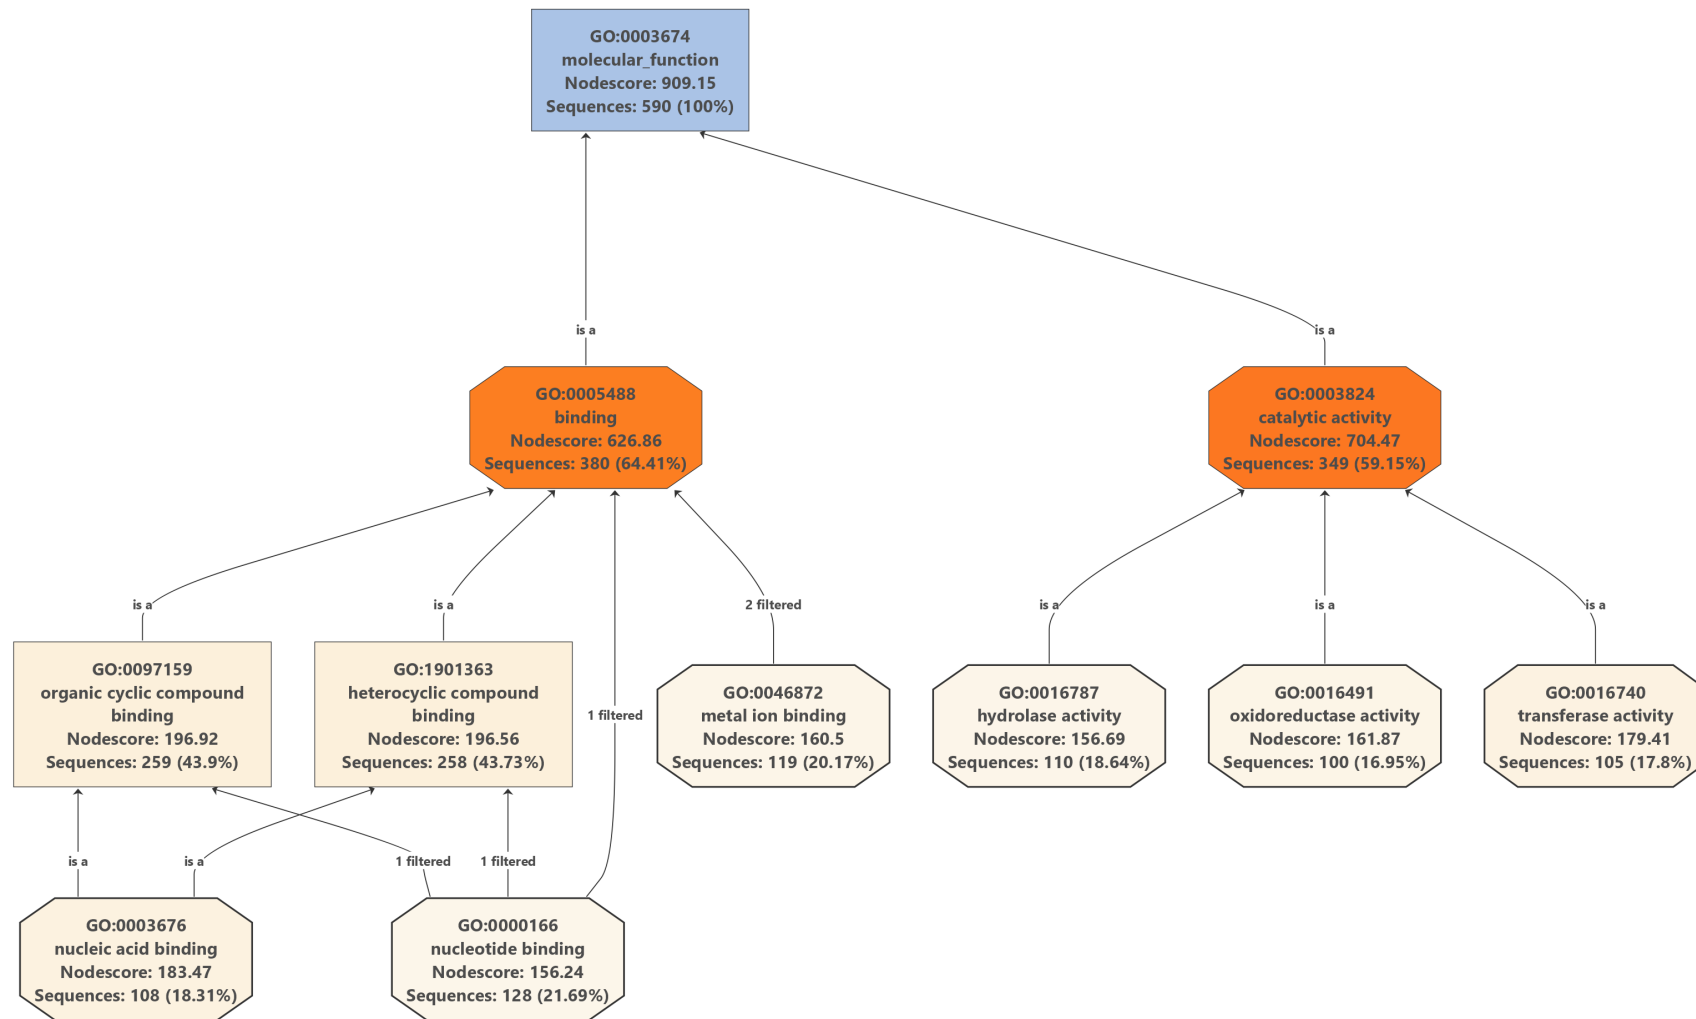

Supplement: s1 [file s1]

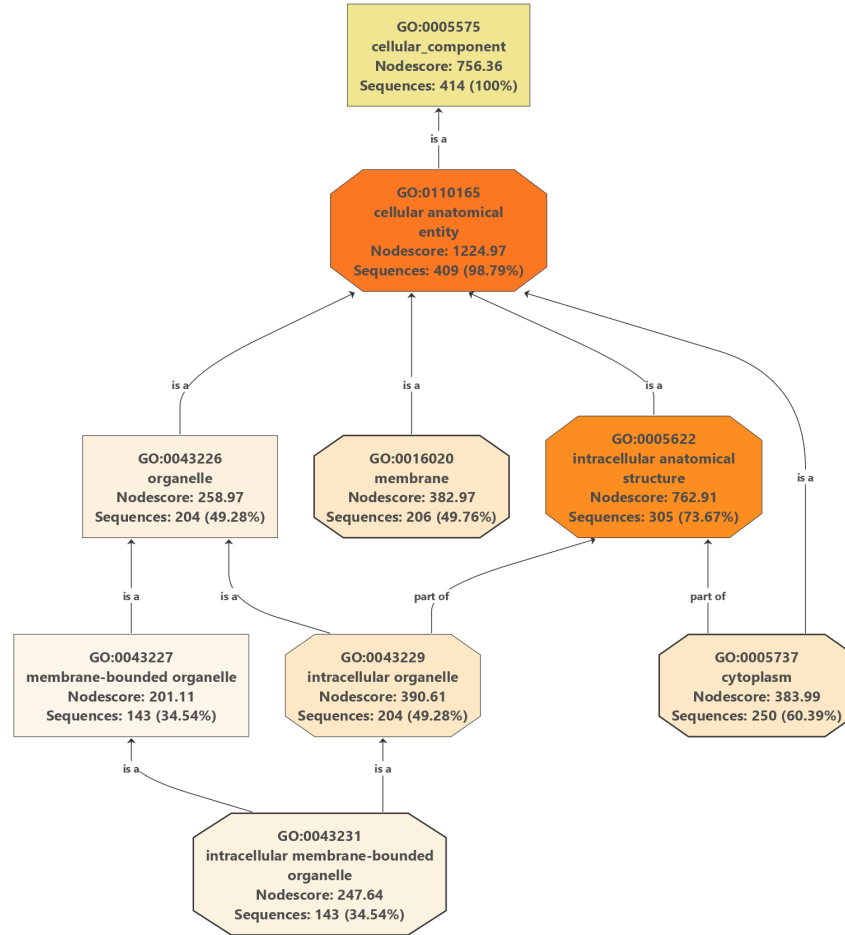

Supplement: s1 [file s1]

**A**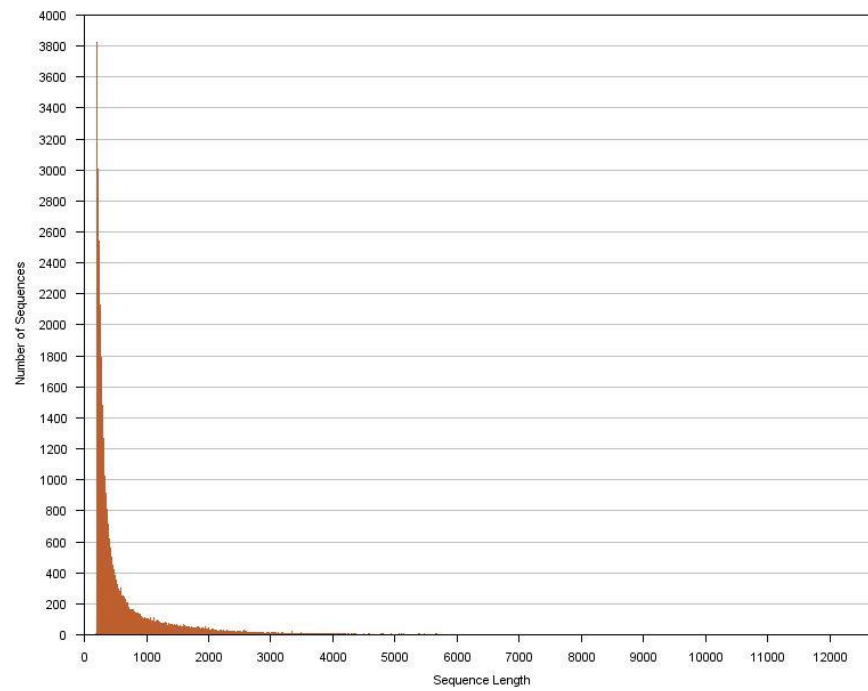**B**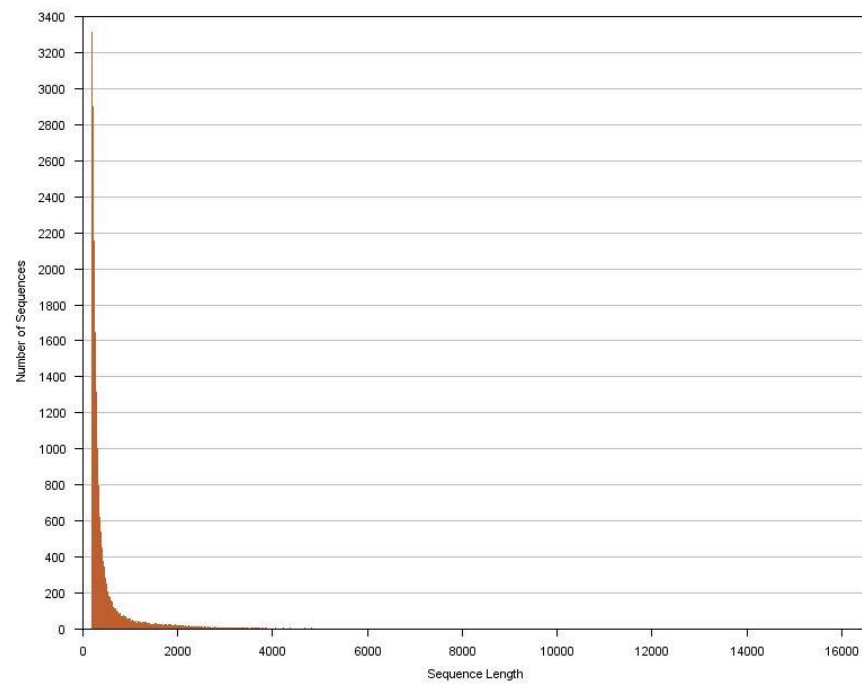

Supplement: s1 [file s1]
